# Supplementary material for: Continuous norming of psychometric tests: A simulation study of parametric and semi-parametric approaches
Source: PLoS One. 2019 Sep 17;14(9):e0222279. doi: 10.1371/journal.pone.0222279 (PMC6748442; doi:10.1371/journal.pone.0222279)
Supplement: S1 Code — (R) [file pone.0222279.s002.R]

#' Crossvalidation simulation study
#'
#' Conducts a cross validation simulation for parametric and semi-parametric continuous
#' test norming. The parametric modelling is based on GAMLSS (NO, BC and SHASHO family),
#' the semi-parametric is based on cNORM. The modelling is done with a sample of seven
#' age groups with varying sample size per age for three different IRT-based scales
#' (easy, medium, difficult). The function is time consuming. 10 cycles roughly need
#' 1 hour of computation. The results are directly aggregated and exported as text data.
#'
#' Before starting the simulation, please install necessary packages via
#' install.packages(c("psych", "cNORM", "gamlss"), dependencies = TRUE)
#' and load the scale and cross validation data stored in 'validationSample.rda'
#'
#' Please note that the simulation is time consuming and takes approx. 50 hours for
#' 100 complete repetitions on standard hardware. If you want to replicate the findings,
#' you might want to start several R sessions to speed up the computation.
#'
#' @param the number of repetitions
#'
#' @return
#' @export
#'
#' @examples
#' crossval(10)
#'
crossval <- function(repetitions) {
  require(gamlss)
  require(psych)
  require(cNORM)

  # define basic variables: upper and lower T score boundary, sample size
  lowerT <- 20
  upperT <- 80
  sample <- list(50, 75, 100, 150, 250, 500, 1000)
  difficulty <- list(theta1, theta2, theta3)

  # data frame for results of modelling; correlations and global RMSE
  results <- data.frame(
    repetition = integer(),
    sample = integer(),
    delta = integer(),
    t = integer(),
    R2adj = double(),
    gamlssModel0 = integer(),
    gamlssModel1 = integer(),
    gamlssModel2 = integer(),
    train_raw_z = double(),
    train_raw_tcNORM = double(),
    train_raw_tGAMLSS0 = double(),
    train_raw_tGAMLSS1 = double(),
    train_raw_tGAMLSS2 = double(),
    train_z_tcNORM = double(),
    train_z_tGAMLSS0 = double(),
    train_z_tGAMLSS1 = double(),
    train_z_tGAMLSS2 = double(),
    train_z_T = double(),
    cross_raw_z = double(),
    cross_raw_tcNORM = double(),
    cross_raw_tGAMLSS0 = double(),
    cross_raw_tGAMLSS1 = double(),
    cross_raw_tGAMLSS2 = double(),
    cross_z_tcNORM = double(),
    cross_z_tGAMLSS0 = double(),
    cross_z_tGAMLSS1 = double(),
    cross_z_tGAMLSS2 = double(),
    cross_z_T = double(),
    rmseCNORM = double(),
    rmseGAMLSS0 = double(),
    rmseGAMLSS1 = double(),
    rmseGAMLSS2 = double(),
    seCNORM = double(),
    seGAMLSS0 = double(),
    seGAMLSS1 = double(),
    seGAMLSS2 = double(),
    winner = double()
  )

  # data frame for descriptives of raw scores
  descriptives <- data.frame(
    totalMeanTrain = double(),
    totalMedianTrain = double(),
    totalSDTrain = double(),
    totalSkewTrain = double(),
    totalKurtosisTrain = double(),
    totalMeanTest = double(),
    totalMedianTest = double(),
    totalSDTest = double(),
    totalSkewTest = double(),
    totalKurtosisTest = double(),
    meanTrain1 = double(),
    meanTrain2 = double(),
    meanTrain3 = double(),
    meanTrain4 = double(),
    meanTrain5 = double(),
    meanTrain6 = double(),
    meanTrain7 = double(),
    medianTrain1 = double(),
    medianTrain2 = double(),
    medianTrain3 = double(),
    medianTrain4 = double(),
    medianTrain5 = double(),
    medianTrain6 = double(),
    medianTrain7 = double(),
    sDTrain1 = double(),
    sDTrain2 = double(),
    sDTrain3 = double(),
    sDTrain4 = double(),
    sDTrain5 = double(),
    sDTrain6 = double(),
    sDTrain7 = double(),
    skewTrain1 = double(),
    skewTrain2 = double(),
    skewTrain3 = double(),
    skewTrain4 = double(),
    skewTrain5 = double(),
    skewTrain6 = double(),
    skewTrain7 = double(),
    kurtosisTrain1 = double(),
    kurtosisTrain2 = double(),
    kurtosisTrain3 = double(),
    kurtosisTrain4 = double(),
    kurtosisTrain5 = double(),
    kurtosisTrain6 = double(),
    kurtosisTrain7 = double(),
    meanTest1 = double(),
    meanTest2 = double(),
    meanTest3 = double(),
    meanTest4 = double(),
    meanTest5 = double(),
    meanTest6 = double(),
    meanTest7 = double(),
    medianTest1 = double(),
    medianTest2 = double(),
    medianTest3 = double(),
    medianTest4 = double(),
    medianTest5 = double(),
    medianTest6 = double(),
    medianTest7 = double(),
    sDTest1 = double(),
    sDTest2 = double(),
    sDTest3 = double(),
    sDTest4 = double(),
    sDTest5 = double(),
    sDTest6 = double(),
    sDTest7 = double(),
    skewTest1 = double(),
    skewTest2 = double(),
    skewTest3 = double(),
    skewTest4 = double(),
    skewTest5 = double(),
    skewTest6 = double(),
    skewTest7 = double(),
    kurtosisTest1 = double(),
    kurtosisTest2 = double(),
    kurtosisTest3 = double(),
    kurtosisTest4 = double(),
    kurtosisTest5 = double(),
    kurtosisTest6 = double(),
    kurtosisTest7 = double()
  )

  # data frame for T score diff values in validation data for ability levels
  segments <- data.frame(
    diff_cnorm1 = double(),
    diff_cnorm2 = double(),
    diff_cnorm3 = double(),
    diff_cnorm4 = double(),
    diff_cnorm5 = double(),
    diff_cnorm6 = double(),
    diff_cnorm7 = double(),
    diff_cnorm8 = double(),
    diff_cnorm9 = double(),
    diff_cnorm10 = double(),
    diff_cnorm11 = double(),
    diff_cnorm12 = double(),
    diff_cnorm13 = double(),
    diff_cnorm14 = double(),
    diff_no1 = double(),
    diff_no2 = double(),
    diff_no3 = double(),
    diff_no4 = double(),
    diff_no5 = double(),
    diff_no6 = double(),
    diff_no7 = double(),
    diff_no8 = double(),
    diff_no9 = double(),
    diff_no10 = double(),
    diff_no11 = double(),
    diff_no12 = double(),
    diff_no13 = double(),
    diff_no14 = double(),
    diff_bc1 = double(),
    diff_bc2 = double(),
    diff_bc3 = double(),
    diff_bc4 = double(),
    diff_bc5 = double(),
    diff_bc6 = double(),
    diff_bc7 = double(),
    diff_bc8 = double(),
    diff_bc9 = double(),
    diff_bc10 = double(),
    diff_bc11 = double(),
    diff_bc12 = double(),
    diff_bc13 = double(),
    diff_bc14 = double(),
    diff_shasho1 = double(),
    diff_shasho2 = double(),
    diff_shasho3 = double(),
    diff_shasho4 = double(),
    diff_shasho5 = double(),
    diff_shasho6 = double(),
    diff_shasho7 = double(),
    diff_shasho8 = double(),
    diff_shasho9 = double(),
    diff_shasho10 = double(),
    diff_shasho11 = double(),
    diff_shasho12 = double(),
    diff_shasho13 = double(),
    diff_shasho14 = double()
  )

  # data frame for RMSE in validation data for ability levels
  rmse <- data.frame(
    rmse_cnorm1 = double(),
    rmse_cnorm2 = double(),
    rmse_cnorm3 = double(),
    rmse_cnorm4 = double(),
    rmse_cnorm5 = double(),
    rmse_cnorm6 = double(),
    rmse_cnorm7 = double(),
    rmse_cnorm8 = double(),
    rmse_cnorm9 = double(),
    rmse_cnorm10 = double(),
    rmse_cnorm11 = double(),
    rmse_cnorm12 = double(),
    rmse_cnorm13 = double(),
    rmse_cnorm14 = double(),
    rmse_no1 = double(),
    rmse_no2 = double(),
    rmse_no3 = double(),
    rmse_no4 = double(),
    rmse_no5 = double(),
    rmse_no6 = double(),
    rmse_no7 = double(),
    rmse_no8 = double(),
    rmse_no9 = double(),
    rmse_no10 = double(),
    rmse_no11 = double(),
    rmse_no12 = double(),
    rmse_no13 = double(),
    rmse_no14 = double(),
    rmse_bc1 = double(),
    rmse_bc2 = double(),
    rmse_bc3 = double(),
    rmse_bc4 = double(),
    rmse_bc5 = double(),
    rmse_bc6 = double(),
    rmse_bc7 = double(),
    rmse_bc8 = double(),
    rmse_bc9 = double(),
    rmse_bc10 = double(),
    rmse_bc11 = double(),
    rmse_bc12 = double(),
    rmse_bc13 = double(),
    rmse_bc14 = double(),
    rmse_shasho1 = double(),
    rmse_shasho2 = double(),
    rmse_shasho3 = double(),
    rmse_shasho4 = double(),
    rmse_shasho5 = double(),
    rmse_shasho6 = double(),
    rmse_shasho7 = double(),
    rmse_shasho8 = double(),
    rmse_shasho9 = double(),
    rmse_shasho10 = double(),
    rmse_shasho11 = double(),
    rmse_shasho12 = double(),
    rmse_shasho13 = double(),
    rmse_shasho14 = double()
  )

  # data frame for RMSE in validation data for ability levels
  se <- data.frame(
    se_cnorm1 = double(),
    se_cnorm2 = double(),
    se_cnorm3 = double(),
    se_cnorm4 = double(),
    se_cnorm5 = double(),
    se_cnorm6 = double(),
    se_cnorm7 = double(),
    se_cnorm8 = double(),
    se_cnorm9 = double(),
    se_cnorm10 = double(),
    se_cnorm11 = double(),
    se_cnorm12 = double(),
    se_cnorm13 = double(),
    se_cnorm14 = double(),
    se_no1 = double(),
    se_no2 = double(),
    se_no3 = double(),
    se_no4 = double(),
    se_no5 = double(),
    se_no6 = double(),
    se_no7 = double(),
    se_no8 = double(),
    se_no9 = double(),
    se_no10 = double(),
    se_no11 = double(),
    se_no12 = double(),
    se_no13 = double(),
    se_no14 = double(),
    se_bc1 = double(),
    se_bc2 = double(),
    se_bc3 = double(),
    se_bc4 = double(),
    se_bc5 = double(),
    se_bc6 = double(),
    se_bc7 = double(),
    se_bc8 = double(),
    se_bc9 = double(),
    se_bc10 = double(),
    se_bc11 = double(),
    se_bc12 = double(),
    se_bc13 = double(),
    se_bc14 = double(),
    se_shasho1 = double(),
    se_shasho2 = double(),
    se_shasho3 = double(),
    se_shasho4 = double(),
    se_shasho5 = double(),
    se_shasho6 = double(),
    se_shasho7 = double(),
    se_shasho8 = double(),
    se_shasho9 = double(),
    se_shasho10 = double(),
    se_shasho11 = double(),
    se_shasho12 = double(),
    se_shasho13 = double(),
    se_shasho14 = double()
  )
  # start loop for all combinations of scales and sample size and repetitions as desired
  for (k in 1:repetitions) {
    for (i in 1:length(sample)) {
      for (j in 1:length(difficulty)) {

        # boolean to skip cycle in case GAMLSS does not converge
        CONT <- TRUE

        # preparation: simulate Rasch test based random data for training
        # and representative validation data set
        tmp <- simulateRasch(n = sample[[i]], Theta = difficulty[[j]])
        tmp <- data.frame(age = tmp$sim$age, group = tmp$sim$group, z = tmp$sim$z, m = tmp$sim$m, sd = tmp$sim$sd, latent = tmp$sim$latent, zOverall = tmp$sim$zOverall)
        tmp$zOverall <- (tmp$latent - 5.0973533676) / 3.1268747761 # center data
        training.data <- simulateRasch(data = tmp, Theta = difficulty[[j]]) # simulate training data
        test.data <- simulateRasch(data = cross, Theta = difficulty[[j]]) # simulate validation data based on large representative sample

        # hack to get gamlss BC family to work; add constant to avoid zeros
        training.data$data$raw1 <- training.data$data$raw + 1
        test.data$data$raw1 <- test.data$data$raw + 1


        # calculate cNORM model; first rank data
        training.data$data <- rankBySlidingWindow(training.data$data, age = "age", width = 1, raw = "raw")
        training.data$data <- computePowers(training.data$data, age = "age")
        test.data$data <- rankByGroup(test.data$data)

        # correlation between observed norm score and latent ability in validation
        # data set (not cross validated; theoretical maximum threshold of modelling)
        cross_z_T <- cor(test.data$sim$z, test.data$data$normValue, use = "pairwise.complete.obs")


        # build cNORM model, assume t = 4 as default solution
        t <- 4
        cnorm.model <- bestModel(training.data$data, terms = t)

        # in case of inconsistencies, search for consistent model
        # start with three terms and continue up to maximum number of 24 in k = 4
        if (checkConsistency(cnorm.model, minRaw = 0, maxRaw = length(difficulty[[j]]))) {
          t <- 3
          end <- 24
          cnorm.model <- bestModel(training.data$data, terms = t)

          while (checkConsistency(cnorm.model, minRaw = 0, maxRaw = length(difficulty[[j]])) && t < end) {
            t <- t + 1
            cnorm.model <- bestModel(training.data$data, terms = t)
          }
        }

        # project cNORM model on training validation data
        training.data$data$tCNORM <- predictNorm(training.data$data$raw, training.data$data$age, cnorm.model, lowerT, upperT)

        # project cNORM model on training and validation data, compute correlations and RMSE
        test.data$data$tCNORM <- predictNorm(test.data$data$raw, test.data$data$age, cnorm.model, lowerT, upperT)
        cross_z_tcNORM <- cor(test.data$sim$z, test.data$data$tCNORM, use = "pairwise.complete.obs")
        rmseCNORM <- sqrt(mean((test.data$data$normValue - test.data$data$tCNORM)^2, na.rm=TRUE))
        seCNORM <- mean((test.data$data$normValue - test.data$data$tCNORM), na.rm=TRUE)

        # compute GAMLSS normal (NO) model; catch if model does not converge
        gamlssModel0 <- "Not converged"
        cross_z_tGAMLSS0 <- 0
        train_raw_tGAMLSS0 <- 0
        train_z_tGAMLSS0 <- 0
        cross_raw_tGAMLSS0 <- 0
        rmseGAMLSS0 <- NA
        seGAMLSS0 <- NA

        tryCatch({
          gamlss.model0 <- lms(raw, age, data = training.data$data, families = c("NO", "NOF"))
        }, error = function(e) {
          print("catch0 reached")
          CONT <- FALSE
        })

        # completely skip cycle if NO modelling totally failed
        if(!exists("gamlss.model0")||!CONT){
          next
        }

        # project GAMLSS normal model on training and validation data; restrict to upper and lower
        # T score; compute correlations and RMSE
        tryCatch({
          training.data$data$tGAMLSS0 <- z.scores(gamlss.model0, y = training.data$data$raw, x = training.data$data$age) * 10 + 50
          training.data$data$tGAMLSS0[training.data$data$tGAMLSS0 < lowerT] <- lowerT
          training.data$data$tGAMLSS0[training.data$data$tGAMLSS0 > upperT] <- upperT
          test.data$data$tGAMLSS0 <- z.scores(gamlss.model0, y = test.data$data$raw, x = test.data$data$age) * 10 + 50
          test.data$data$tGAMLSS0[test.data$data$tGAMLSS0 < lowerT] <- lowerT
          test.data$data$tGAMLSS0[test.data$data$tGAMLSS0 > upperT] <- upperT
          gamlssModel0 <- gamlss.model0$family[1]
          train_raw_tGAMLSS0 <- cor(training.data$data$raw, training.data$data$tGAMLSS0, use = "pairwise.complete.obs")
          cross_z_tGAMLSS0 <- cor(test.data$sim$z, test.data$data$tGAMLSS0, use = "pairwise.complete.obs")
          train_z_tGAMLSS0 <- cor(training.data$sim$z, training.data$data$tGAMLSS0, use = "pairwise.complete.obs")
          cross_raw_tGAMLSS0 <- cor(test.data$data$raw, test.data$data$tGAMLSS0, use = "pairwise.complete.obs")
          rmseGAMLSS0 <- sqrt(mean((test.data$data$normValue - test.data$data$tGAMLSS0)^2))
          seGAMLSS0 <- mean((test.data$data$normValue - test.data$data$tGAMLSS0))
        }, error = function(e) {
          print("GAMLSS NO family catch reached")
          CONT <- FALSE
        })

        # completely skip cycle if NO modelling totally failed
        if(!CONT){
          next
        }

        # compute GAMLSS BC model; catch if model does not converge
        gamlssModel1 <- "Not converged"
        vote1 <- 1
        cross_z_tGAMLSS1 <- 0
        train_raw_tGAMLSS1 <- 0
        train_z_tGAMLSS1 <- 0
        cross_raw_tGAMLSS1 <- 0
        rmseGAMLSS1 <- NA
        seGAMLSS1 <- NA
        tryCatch({
          gamlss.model1 <- lms(raw1, age, data = training.data$data, c("BCCGo", "BCPEo", "BCTo"))
        }, error = function(e) {
          print("GAMLSS BC family catch reached")
          CONT <- FALSE
        })

        # completely skip cycle if BC modelling totally failed
        if(!exists("gamlss.model1")||!CONT){
          next
        }

        # project GAMLSS BC model on training and validation data; restrict to upper and lower
        # T score; compute correlations and RMSE
        tryCatch({
          training.data$data$tGAMLSS1 <- z.scores(gamlss.model1, y = training.data$data$raw1, x = training.data$data$age) * 10 + 50
          training.data$data$tGAMLSS1[training.data$data$tGAMLSS1 < lowerT] <- lowerT
          training.data$data$tGAMLSS1[training.data$data$tGAMLSS1 > upperT] <- upperT
          test.data$data$tGAMLSS1 <- z.scores(gamlss.model1, y = test.data$data$raw1, x = test.data$data$age) * 10 + 50
          test.data$data$tGAMLSS1[test.data$data$tGAMLSS1 < lowerT] <- lowerT
          test.data$data$tGAMLSS1[test.data$data$tGAMLSS1 > upperT] <- upperT
          gamlssModel1 <- gamlss.model1$family[1]
          train_raw_tGAMLSS1 <- cor(training.data$data$raw1, training.data$data$tGAMLSS1, use = "pairwise.complete.obs")
          cross_z_tGAMLSS1 <- cor(test.data$sim$z, test.data$data$tGAMLSS1, use = "pairwise.complete.obs")
          train_z_tGAMLSS1 <- cor(training.data$sim$z, training.data$data$tGAMLSS1, use = "pairwise.complete.obs")
          cross_raw_tGAMLSS1 <- cor(test.data$data$raw1, test.data$data$tGAMLSS1, use = "pairwise.complete.obs")
          rmseGAMLSS1 <- sqrt(mean((test.data$data$normValue - test.data$data$tGAMLSS1)^2))
          seGAMLSS1 <- mean((test.data$data$normValue - test.data$data$tGAMLSS1))
        }, error = function(e) {
          print("catch2 reached")
          CONT <- FALSE
        })

        # completely skip cycle if BC modelling totally failed
        if(!CONT){
          next
        }


        # compute GAMLSS SHaSHo model; catch if model does not converge
        gamlssModel2 <- "Not converged"
        vote2 <- 1
        cross_z_tGAMLSS2 <- 0
        train_raw_tGAMLSS2 <- 0
        train_z_tGAMLSS2 <- 0
        cross_raw_tGAMLSS2 <- 0
        rmseGAMLSS2 <- NA
        seGAMLSS2 <- NA
        tryCatch({
          gamlss.model2 <- lms(raw, age, data = training.data$data, families = c("SHASHo"))
        }, error = function(e) {
          print("catch2 reached")
          CONT <- FALSE
        })

        # completely skip cycle if SHASH modelling totally failed
        if(!exists("gamlss.model2")||!CONT){
          next
        }

        # project GAMLSS SHaSHo model on training and validation data; restrict to upper and lower
        # T score; compute correlations and RMSE
        tryCatch({
          training.data$data$tGAMLSS2 <- z.scores(gamlss.model2, y = training.data$data$raw, x = training.data$data$age) * 10 + 50
          training.data$data$tGAMLSS2[training.data$data$tGAMLSS2 < lowerT] <- lowerT
          training.data$data$tGAMLSS2[training.data$data$tGAMLSS2 > upperT] <- upperT
          test.data$data$tGAMLSS2 <- z.scores(gamlss.model2, y = test.data$data$raw, x = test.data$data$age) * 10 + 50
          test.data$data$tGAMLSS2[test.data$data$tGAMLSS2 < lowerT] <- lowerT
          test.data$data$tGAMLSS2[test.data$data$tGAMLSS2 > upperT] <- upperT
          gamlssModel2 <- gamlss.model2$family[1]
          train_raw_tGAMLSS2 <- cor(training.data$data$raw, training.data$data$tGAMLSS2, use = "pairwise.complete.obs")
          train_z_tGAMLSS2 <- cor(training.data$sim$z, training.data$data$tGAMLSS2, use = "pairwise.complete.obs")
          cross_raw_tGAMLSS2 <- cor(test.data$data$raw, test.data$data$tGAMLSS2, use = "pairwise.complete.obs")
          cross_z_tGAMLSS2 <- cor(test.data$sim$z, test.data$data$tGAMLSS2, use = "pairwise.complete.obs")
          rmseGAMLSS2 <- sqrt(mean((test.data$data$normValue - test.data$data$tGAMLSS2)^2))
          seGAMLSS2 <- mean((test.data$data$normValue - test.data$data$tGAMLSS2))
        }, error = function(e) {
          print("catch3 reached")
          CONT <- FALSE
        })

        # completely skip cycle if SHASH modelling totally failed
        if(!CONT){
          next
        }


        print(paste0("Saving cycle ", k, " ", i, " ", j))

        # now collect and combine data; first the global correlation and RMSE
        r <- data.frame(
          repetition = k,
          sample = length(training.data$data$raw),
          delta = j,
          terms = t,
          R2adj = cnorm.model$subsets$adjr2[[cnorm.model$ideal.model]],
          gamlssModel0 = gamlssModel0,
          gamlssModel1 = gamlssModel1,
          gamlssModel2 = gamlssModel2,
          train_raw_z = cor(training.data$data$raw, training.data$sim$z, use = "pairwise.complete.obs"),
          train_raw_tcNORM = cor(training.data$data$raw, training.data$data$tCNORM, use = "pairwise.complete.obs"),
          train_raw_tGAMLSS0 = train_raw_tGAMLSS0,
          train_raw_tGAMLSS1 = train_raw_tGAMLSS1,
          train_raw_tGAMLSS2 = train_raw_tGAMLSS2,
          train_z_tcNORM = cor(training.data$sim$z, training.data$data$tCNORM, use = "pairwise.complete.obs"),
          train_z_tGAMLSS0 = train_z_tGAMLSS0,
          train_z_tGAMLSS1 = train_z_tGAMLSS1,
          train_z_tGAMLSS2 = train_z_tGAMLSS2,
          train_z_T = cor(training.data$sim$z, training.data$data$normValue, use = "pairwise.complete.obs"),
          cross_raw_z = cor(test.data$data$raw, test.data$sim$z, use = "pairwise.complete.obs"),
          cross_raw_tcNORM = cor(test.data$data$raw, test.data$data$tCNORM, use = "pairwise.complete.obs"),
          cross_raw_tGAMLSS0 = cross_raw_tGAMLSS0,
          cross_raw_tGAMLSS1 = cross_raw_tGAMLSS1,
          cross_raw_tGAMLSS2 = cross_raw_tGAMLSS2,
          cross_z_tcNORM = cross_z_tcNORM,
          cross_z_tGAMLSS0 = cross_z_tGAMLSS0,
          cross_z_tGAMLSS1 = cross_z_tGAMLSS1,
          cross_z_tGAMLSS2 = cross_z_tGAMLSS2,
          cross_z_T = cross_z_T,
          rmseCNORM = rmseCNORM,
          rmseGAMLSS0 = rmseGAMLSS0,
          rmseGAMLSS1 = rmseGAMLSS1,
          rmseGAMLSS2 = rmseGAMLSS2,
          seCNORM = seCNORM,
          seGAMLSS0 = seGAMLSS0,
          seGAMLSS1 = seGAMLSS1,
          seGAMLSS2 = seGAMLSS2,
          winner = which.max(c(cross_z_tcNORM, cross_z_tGAMLSS0, cross_z_tGAMLSS1, cross_z_tGAMLSS2))
        )
        results <- rbind(results, r)

        # collect descriptive data on raw scores (global and per group)
        totalTrain <- describe(training.data$data$raw)
        totalTest <- describe(test.data$data$raw)
        descTrain <- describeBy(training.data$data$raw, group = training.data$data$group)
        descTest <- describeBy(test.data$data$raw, group = test.data$data$group)

        d <- data.frame(
          totalMeanTrain = totalTrain$mean,
          totalMedianTrain = totalTrain$median,
          totalSDTrain = totalTrain$sd,
          totalSkewTrain = totalTrain$skew,
          totalKurtosisTrain = totalTrain$kurtosis,
          totalMeanTest = totalTest$mean,
          totalMedianTest = totalTest$median,
          totalSDTest = totalTest$sd,
          totalSkewTest = totalTest$skew,
          totalKurtosisTest = totalTest$kurtosis,
          meanTrain1 = descTrain[[1]]$mean,
          meanTrain2 = descTrain[[2]]$mean,
          meanTrain3 = descTrain[[3]]$mean,
          meanTrain4 = descTrain[[4]]$mean,
          meanTrain5 = descTrain[[5]]$mean,
          meanTrain6 = descTrain[[6]]$mean,
          meanTrain7 = descTrain[[7]]$mean,
          medianTrain1 = descTrain[[1]]$median,
          medianTrain2 = descTrain[[2]]$median,
          medianTrain3 = descTrain[[3]]$median,
          medianTrain4 = descTrain[[4]]$median,
          medianTrain5 = descTrain[[5]]$median,
          medianTrain6 = descTrain[[6]]$median,
          medianTrain7 = descTrain[[7]]$median,
          sDTrain1 = descTrain[[1]]$sd,
          sDTrain2 = descTrain[[2]]$sd,
          sDTrain3 = descTrain[[3]]$sd,
          sDTrain4 = descTrain[[4]]$sd,
          sDTrain5 = descTrain[[5]]$sd,
          sDTrain6 = descTrain[[6]]$sd,
          sDTrain7 = descTrain[[7]]$sd,
          skewTrain1 = descTrain[[1]]$skew,
          skewTrain2 = descTrain[[2]]$skew,
          skewTrain3 = descTrain[[3]]$skew,
          skewTrain4 = descTrain[[4]]$skew,
          skewTrain5 = descTrain[[5]]$skew,
          skewTrain6 = descTrain[[6]]$skew,
          skewTrain7 = descTrain[[7]]$skew,
          kurtosisTrain1 = descTrain[[1]]$kurtosis,
          kurtosisTrain2 = descTrain[[2]]$kurtosis,
          kurtosisTrain3 = descTrain[[3]]$kurtosis,
          kurtosisTrain4 = descTrain[[4]]$kurtosis,
          kurtosisTrain5 = descTrain[[5]]$kurtosis,
          kurtosisTrain6 = descTrain[[6]]$kurtosis,
          kurtosisTrain7 = descTrain[[7]]$kurtosis,
          meanTest1 = descTest[[1]]$mean,
          meanTest2 = descTest[[2]]$mean,
          meanTest3 = descTest[[3]]$mean,
          meanTest4 = descTest[[4]]$mean,
          meanTest5 = descTest[[5]]$mean,
          meanTest6 = descTest[[6]]$mean,
          meanTest7 = descTest[[7]]$mean,
          medianTest1 = descTest[[1]]$median,
          medianTest2 = descTest[[2]]$median,
          medianTest3 = descTest[[3]]$median,
          medianTest4 = descTest[[4]]$median,
          medianTest5 = descTest[[5]]$median,
          medianTest6 = descTest[[6]]$median,
          medianTest7 = descTest[[7]]$median,
          sDTest1 = descTest[[1]]$sd,
          sDTest2 = descTest[[2]]$sd,
          sDTest3 = descTest[[3]]$sd,
          sDTest4 = descTest[[4]]$sd,
          sDTest5 = descTest[[5]]$sd,
          sDTest6 = descTest[[6]]$sd,
          sDTest7 = descTest[[7]]$sd,
          skewTest1 = descTest[[1]]$skew,
          skewTest2 = descTest[[2]]$skew,
          skewTest3 = descTest[[3]]$skew,
          skewTest4 = descTest[[4]]$skew,
          skewTest5 = descTest[[5]]$skew,
          skewTest6 = descTest[[6]]$skew,
          skewTest7 = descTest[[7]]$skew,
          kurtosisTest1 = descTest[[1]]$kurtosis,
          kurtosisTest2 = descTest[[2]]$kurtosis,
          kurtosisTest3 = descTest[[3]]$kurtosis,
          kurtosisTest4 = descTest[[4]]$kurtosis,
          kurtosisTest5 = descTest[[5]]$kurtosis,
          kurtosisTest6 = descTest[[6]]$kurtosis,
          kurtosisTest7 = descTest[[7]]$kurtosis
        )
        descriptives <- rbind(descriptives, d)


        # differential analysis of fit in ability levels
        # please note that analysis results in 14 levels; interval 14 has to be discarded lateron,
        # because it usually includes NAs (due to bindings in raw score; extreme values usually are not
        # present in data)

        parts <- data.frame(
          z = test.data$data$z,
          t = test.data$data$normValue,
          cnorm = test.data$data$tCNORM,
          no = test.data$data$tGAMLSS0,
          bc = test.data$data$tGAMLSS1,
          shasho = test.data$data$tGAMLSS2,
          rmeC = (test.data$data$normValue - test.data$data$tCNORM)^2,
          rmeG1 = (test.data$data$normValue - test.data$data$tGAMLSS0)^2,
          rmeG2 = (test.data$data$normValue - test.data$data$tGAMLSS1)^2,
          rmeG3 = (test.data$data$normValue - test.data$data$tGAMLSS2)^2,
          seC = test.data$data$normValue - test.data$data$tCNORM,
          seG1 = test.data$data$normValue - test.data$data$tGAMLSS0,
          seG2 = test.data$data$normValue - test.data$data$tGAMLSS1,
          seG3 = test.data$data$normValue - test.data$data$tGAMLSS2
        )

        parts$interval <- findInterval(parts$t, c(20, 25, 30, 35, 40, 45, 50, 55, 60, 65, 70, 75, 80))

        # collect absolute difference in T score per ability level
        diff <- data.frame(cnorm = aggregate(abs(parts$t-parts$cnorm), list(parts$interval), mean, na.rm=T)$x,
                           no = aggregate(abs(parts$t-parts$no), list(parts$interval), mean, na.rm=T)$x,
                           bc = aggregate(abs(parts$t-parts$bc), list(parts$interval), mean, na.rm=T)$x,
                           shasho = aggregate(abs(parts$t-parts$shasho), list(parts$interval), mean, na.rm=T)$x)

        # intervals spanning 5 T score points each, beginning with ability level 1: T >= 20 to <25
        # level 2: T >= 25 to <30 ...
        # up to ability level 13: residual category for T scores exactly 80; should be deleted in analysis
        s <- data.frame(
          diff_cnorm1 = diff[1, 1],
          diff_cnorm2 = diff[2, 1],
          diff_cnorm3 = diff[3, 1],
          diff_cnorm4 = diff[4, 1],
          diff_cnorm5 = diff[5, 1],
          diff_cnorm6 = diff[6, 1],
          diff_cnorm7 = diff[7, 1],
          diff_cnorm8 = diff[8, 1],
          diff_cnorm9 = diff[9, 1],
          diff_cnorm10 = diff[10, 1],
          diff_cnorm11 = diff[11, 1],
          diff_cnorm12 = diff[12, 1],
          diff_cnorm13 = diff[13, 1],
          diff_no1 = diff[1, 2],
          diff_no2 = diff[2, 2],
          diff_no3 = diff[3, 2],
          diff_no4 = diff[4, 2],
          diff_no5 = diff[5, 2],
          diff_no6 = diff[6, 2],
          diff_no7 = diff[7, 2],
          diff_no8 = diff[8, 2],
          diff_no9 = diff[9, 2],
          diff_no10 = diff[10, 2],
          diff_no11 = diff[11, 2],
          diff_no12 = diff[12, 2],
          diff_no13 = diff[13, 2],
          diff_bc1 = diff[1, 3],
          diff_bc2 = diff[2, 3],
          diff_bc3 = diff[3, 3],
          diff_bc4 = diff[4, 3],
          diff_bc5 = diff[5, 3],
          diff_bc6 = diff[6, 3],
          diff_bc7 = diff[7, 3],
          diff_bc8 = diff[8, 3],
          diff_bc9 = diff[9, 3],
          diff_bc10 = diff[10, 3],
          diff_bc11 = diff[11, 3],
          diff_bc12 = diff[12, 3],
          diff_bc13 = diff[13, 3],
          diff_shasho1 = diff[1, 4],
          diff_shasho2 = diff[2, 4],
          diff_shasho3 = diff[3, 4],
          diff_shasho4 = diff[4, 4],
          diff_shasho5 = diff[5, 4],
          diff_shasho6 = diff[6, 4],
          diff_shasho7 = diff[7, 4],
          diff_shasho8 = diff[8, 4],
          diff_shasho9 = diff[9, 4],
          diff_shasho10 = diff[10, 4],
          diff_shasho11 = diff[11, 4],
          diff_shasho12 = diff[12, 4],
          diff_shasho13 = diff[13, 4]
        )

        segments <- rbind(segments, s)

        # collect RMSE of T score in validation per ability level
        # intervals spanning 5 T score points each, beginning with ability level 1: T >= 20 to <25
        # level 2: T >= 25 to <30 ...
        # up to ability level 13: residual category for T scores exactly 80; should be deleted in analysis
        meanError <- data.frame(cnorm = aggregate(parts$rmeC, list(parts$interval), mean, na.rm=TRUE, na.action=na.pass, drop = T)$x,
                                no = aggregate(parts$rmeG1, list(parts$interval), mean, na.rm=TRUE, na.action=na.pass)$x,
                                bc = aggregate(parts$rmeG2, list(parts$interval), mean, na.rm=TRUE, na.action=na.pass)$x,
                                shasho = aggregate(parts$rmeG3, list(parts$interval), mean, na.rm=TRUE, na.action=na.pass)$x)
        meanError <- sqrt(meanError)

        rms <- data.frame(
          rmse_cnorm1 = meanError[1, 1],
          rmse_cnorm2 = meanError[2, 1],
          rmse_cnorm3 = meanError[3, 1],
          rmse_cnorm4 = meanError[4, 1],
          rmse_cnorm5 = meanError[5, 1],
          rmse_cnorm6 = meanError[6, 1],
          rmse_cnorm7 = meanError[7, 1],
          rmse_cnorm8 = meanError[8, 1],
          rmse_cnorm9 = meanError[9, 1],
          rmse_cnorm10 = meanError[10, 1],
          rmse_cnorm11 = meanError[11, 1],
          rmse_cnorm12 = meanError[12, 1],
          rmse_cnorm13 = meanError[13, 1],
          rmse_no1 = meanError[1, 2],
          rmse_no2 = meanError[2, 2],
          rmse_no3 = meanError[3, 2],
          rmse_no4 = meanError[4, 2],
          rmse_no5 = meanError[5, 2],
          rmse_no6 = meanError[6, 2],
          rmse_no7 = meanError[7, 2],
          rmse_no8 = meanError[8, 2],
          rmse_no9 = meanError[9, 2],
          rmse_no10 = meanError[10, 2],
          rmse_no11 = meanError[11, 2],
          rmse_no12 = meanError[12, 2],
          rmse_no13 = meanError[13, 2],
          rmse_bc1 = meanError[1, 3],
          rmse_bc2 = meanError[2, 3],
          rmse_bc3 = meanError[3, 3],
          rmse_bc4 = meanError[4, 3],
          rmse_bc5 = meanError[5, 3],
          rmse_bc6 = meanError[6, 3],
          rmse_bc7 = meanError[7, 3],
          rmse_bc8 = meanError[8, 3],
          rmse_bc9 = meanError[9, 3],
          rmse_bc10 = meanError[10, 3],
          rmse_bc11 = meanError[11, 3],
          rmse_bc12 = meanError[12, 3],
          rmse_bc13 = meanError[13, 3],
          rmse_shasho1 = meanError[1, 4],
          rmse_shasho2 = meanError[2, 4],
          rmse_shasho3 = meanError[3, 4],
          rmse_shasho4 = meanError[4, 4],
          rmse_shasho5 = meanError[5, 4],
          rmse_shasho6 = meanError[6, 4],
          rmse_shasho7 = meanError[7, 4],
          rmse_shasho8 = meanError[8, 4],
          rmse_shasho9 = meanError[9, 4],
          rmse_shasho10 = meanError[10, 4],
          rmse_shasho11 = meanError[11, 4],
          rmse_shasho12 = meanError[12, 4],
          rmse_shasho13 = meanError[13, 4]
        )
        rmse <- rbind(rmse, rms)

        # collect RMSE of T score in validation per ability level
        # intervals spanning 5 T score points each, beginning with ability level 1: T >= 20 to <25
        # level 2: T >= 25 to <30 ...
        # up to ability level 13: residual category for T scores exactly 80; should be deleted in analysis
        meanSError <- data.frame(cnorm = aggregate(parts$seC, list(parts$interval), mean, na.rm=TRUE, na.action=na.pass, drop = T)$x,
                                no = aggregate(parts$seG1, list(parts$interval), mean, na.rm=TRUE, na.action=na.pass)$x,
                                bc = aggregate(parts$seG2, list(parts$interval), mean, na.rm=TRUE, na.action=na.pass)$x,
                                shasho = aggregate(parts$seG3, list(parts$interval), mean, na.rm=TRUE, na.action=na.pass)$x)
        ms <- data.frame(
          se_cnorm1 = meanSError[1, 1],
          se_cnorm2 = meanSError[2, 1],
          se_cnorm3 = meanSError[3, 1],
          se_cnorm4 = meanSError[4, 1],
          se_cnorm5 = meanSError[5, 1],
          se_cnorm6 = meanSError[6, 1],
          se_cnorm7 = meanSError[7, 1],
          se_cnorm8 = meanSError[8, 1],
          se_cnorm9 = meanSError[9, 1],
          se_cnorm10 = meanSError[10, 1],
          se_cnorm11 = meanSError[11, 1],
          se_cnorm12 = meanSError[12, 1],
          se_cnorm13 = meanSError[13, 1],
          se_no1 = meanSError[1, 2],
          se_no2 = meanSError[2, 2],
          se_no3 = meanSError[3, 2],
          se_no4 = meanSError[4, 2],
          se_no5 = meanSError[5, 2],
          se_no6 = meanSError[6, 2],
          se_no7 = meanSError[7, 2],
          se_no8 = meanSError[8, 2],
          se_no9 = meanSError[9, 2],
          se_no10 = meanSError[10, 2],
          se_no11 = meanSError[11, 2],
          se_no12 = meanSError[12, 2],
          se_no13 = meanSError[13, 2],
          se_bc1 = meanSError[1, 3],
          se_bc2 = meanSError[2, 3],
          se_bc3 = meanSError[3, 3],
          se_bc4 = meanSError[4, 3],
          se_bc5 = meanSError[5, 3],
          se_bc6 = meanSError[6, 3],
          se_bc7 = meanSError[7, 3],
          se_bc8 = meanSError[8, 3],
          se_bc9 = meanSError[9, 3],
          se_bc10 = meanSError[10, 3],
          se_bc11 = meanSError[11, 3],
          se_bc12 = meanSError[12, 3],
          se_bc13 = meanSError[13, 3],
          se_shasho1 = meanSError[1, 4],
          se_shasho2 = meanSError[2, 4],
          se_shasho3 = meanSError[3, 4],
          se_shasho4 = meanSError[4, 4],
          se_shasho5 = meanSError[5, 4],
          se_shasho6 = meanSError[6, 4],
          se_shasho7 = meanSError[7, 4],
          se_shasho8 = meanSError[8, 4],
          se_shasho9 = meanSError[9, 4],
          se_shasho10 = meanSError[10, 4],
          se_shasho11 = meanSError[11, 4],
          se_shasho12 = meanSError[12, 4],
          se_shasho13 = meanSError[13, 4]
        )
        se <- rbind(se, ms)

        # save everything and combine tables for one big table
        write.table(results, "results.txt", sep = "\t")
        write.table(descriptives, "descriptives.txt", sep = "\t")
        write.table(segments, "segments.txt", sep = "\t")
        write.table(rmse, "rmse.txt", sep = "\t")
        write.table(se, "se.txt", sep = "\t")
        write.table(cbind(results, segments, rmse, se, descriptives), "complete.txt", sep = "\t")
      }
    }
  }
}
