# Supplementary material for: Continuous norming of psychometric tests: A simulation study of parametric and semi-parametric approaches
Source: PLOS journal article supplement (doi:10.1371/journal.pone.0222279), 2019-09-17
Supplement: S3 (10.1371/journal.pone.0222279.s003) [file journal.pone.0222279.s003]

Archive with 1 entries (1 files):
- journal.pone.0222279.s003.out
